# Supplementary material for: Cardiorespiratory Functioning in Youth with Persistent Post-Concussion Symptoms: A Pilot Study
Source: MDPI journal article supplement (doi:10.3390/jcm10040561), 2021-02-03
Supplement: s1 [file s1]

NAME \_\_\_\_\_ DATE \_\_\_\_\_ ID \_\_\_\_\_

### UCLA Return to Activity Avoidance Inventory (RAAvI)

We'd like to know more about how your concussion has affected your ability to do the things you want to do. Some people who have had a concussion may avoid doing different activities because of symptoms (e.g., headaches, dizziness, anxiety, etc.) they experience since the concussion.

List the top three activities that you avoid (e.g., sports, homework, attending class/school, social gatherings). Please be as specific as possible. For example, instead of "sports" you may write "running":

**Activity 1:** \_\_\_\_\_

**Activity 2:** \_\_\_\_\_

**Activity 3:** \_\_\_\_\_

Think about **Activity 1** and answer the following questions:

1. How likely are you to avoid this activity?

|                     |                     |                     |                     |                    |
|---------------------|---------------------|---------------------|---------------------|--------------------|
| None of the<br>time | Some of the<br>time | Half of the<br>time | Most of the<br>time | All of the<br>time |
|---------------------|---------------------|---------------------|---------------------|--------------------|

2. How emotionally or physically distressed would you be doing this activity?

|      |      |          |        |         |
|------|------|----------|--------|---------|
| None | Mild | Moderate | Strong | Extreme |
|------|------|----------|--------|---------|

Now think about **Activity 2** and answer the following questions:

1. How likely are you to avoid this activity?

|                     |                     |                     |                     |                    |
|---------------------|---------------------|---------------------|---------------------|--------------------|
| None of the<br>time | Some of the<br>time | Half of the<br>time | Most of the<br>time | All of the<br>time |
|---------------------|---------------------|---------------------|---------------------|--------------------|

2. How emotionally or physically distressed would you be doing this activity?

|      |      |          |        |         |
|------|------|----------|--------|---------|
| None | Mild | Moderate | Strong | Extreme |
|------|------|----------|--------|---------|

Now think about **Activity 3** and answer the following questions:

1. How likely are you to avoid this activity?

|                     |                     |                     |                     |                    |
|---------------------|---------------------|---------------------|---------------------|--------------------|
| None of the<br>time | Some of the<br>time | Half of the<br>time | Most of the<br>time | All of the<br>time |
|---------------------|---------------------|---------------------|---------------------|--------------------|

2. How emotionally or physically distressed would you be doing this activity?

|      |      |          |        |         |
|------|------|----------|--------|---------|
| None | Mild | Moderate | Strong | Extreme |
|------|------|----------|--------|---------|
